# Supplementary material
Source: PubMed Central journal article supplement (PMC10356145)

## **Supplemental Material**

Supplemental Table 1. Number of county-days and missingness for each inclement weather

Supplemental Table 2. Summary of the follow-up periods of the 60,135 kidney failure patients during 2001-2019

Supplemental Table 3. Number of kidney failure patients per year

Supplemental Table 4. Association between 7-day cumulative exposure (lag 0-6) to inclement weather and missed hemodialysis appointment (incidence rate ratios (RR) and 95% confidence intervals (CI)) stratified by sex and race/ethnicity

Supplemental Figure 1. Lag-specific association between exposure to inclement weather type and risk of missed hemodialysis stratified by sex and race/ethnicity.

Supplemental Figure 2. Lag-specific association between exposure to hurricane and tropical storm and risk of missed appointments stratified by sex and race/ethnicity.

Supplemental Figure 3. Lag-specific association between exposure to snowfall and risk of missed appointments stratified by sex and race/ethnicity.

Supplemental Figure 4. Lag-specific effects on missed hemodialysis appointments in incidence rate ratios (RR) and 95% confidence intervals (CI) for snow depth over 7 days of lag stratified by sex and race/ethnicity.

Supplemental Figure 5. Lag-specific association between exposure to wind advisory (sustained winds) and risk of missed appointments stratified by sex and race/ethnicity.

Supplemental Figure 6. Lag-specific association between exposure for exposure to wind advisory (wind gusts) and risk of missed appointments stratified by sex and race/ethnicity.

Supplemental Figure 7. Association between seven-day cumulative (lag 0-6) exposure to inclement weather type and risk of missed hemodialysis appointment stratified by sex and race/ethnicity.

Supplemental Figure 8. Lag-specific association between exposure to hurricane and tropical storm and risk of missed appointments. Exposure is based on alternative hurricane and tropical storm definitions (distance to storm track at 150 km or less, distance to storm track at 200 km or less, and distance to storm track at 250 km or less).

**Supplemental Table 1. Number of county-days and missingness for each inclement weather**

| <b>Inclement weather type</b>       | <b>Number of counties and study period</b>         | <b>Number of county-days (A)</b> | <b>Number of missing values (B)</b> | <b>% of Missingness (A/B)</b> |
|-------------------------------------|----------------------------------------------------|----------------------------------|-------------------------------------|-------------------------------|
| <b>Rainfall</b>                     | 27 counties, Warmer months (Apr to Oct), 2001-2019 | 98,755                           | 17                                  | 0.0%                          |
| <b>Hurricane and tropical storm</b> | 27 counties, Warmer months (May to Oct), 2001-2019 | 69,899                           | 0                                   | 0.0%                          |
| <b>Snowfall</b>                     | 13 counties, Colder months (Nov to Mar), 2001-2019 | 27,083                           | 1,591                               | 5.9%                          |
| <b>Snow depth</b>                   | 13 counties, Colder months (Nov to Mar), 2001-2019 | 27,083                           | 2,237                               | 8.3%                          |
| <b>Sustained wind speed</b>         | 27 counties, All months, 2001-2019                 | 147,077                          | 137                                 | 0.1%                          |
| <b>Peak wind speed</b>              | 27 counties, All months, 2001-2019                 | 147,077                          | 1,187                               | 0.8%                          |

**Supplemental Table 2. Summary of the follow-up periods of the 60,135 kidney failure patients during 2001-2019**

|                                | <b>Follow-up period (days per person)</b> |
|--------------------------------|-------------------------------------------|
| <b>Min</b>                     | 0                                         |
| <b>1<sup>st</sup> quartile</b> | 42                                        |
| <b>Median</b>                  | 384                                       |
| <b>Mean (SD)</b>               | 793 (1,041)                               |
| <b>3<sup>rd</sup> quartile</b> | 1,157                                     |
| <b>Max</b>                     | 6,938                                     |
| <b>Total</b>                   | 48,044,318                                |

**Supplemental Table 3. Number of kidney failure patients per year**

| <b>Year</b> | <b>Number of Kidney failure patients</b> |
|-------------|------------------------------------------|
| 2001        | 4,368                                    |
| 2002        | 4,953                                    |
| 2003        | 5,418                                    |
| 2004        | 6,426                                    |
| 2005        | 6,398                                    |
| 2006        | 6,973                                    |
| 2007        | 7,298                                    |
| 2008        | 7,783                                    |
| 2009        | 8,484                                    |
| 2010        | 9,172                                    |
| 2011        | 9,824                                    |
| 2012        | 10,182                                   |
| 2013        | 11,432                                   |
| 2014        | 11,962                                   |
| 2015        | 12,428                                   |
| 2016        | 12,812                                   |
| 2017        | 13,410                                   |
| 2018        | 13,752                                   |
| 2019        | 13,983                                   |

**Supplemental Table 4. Association between 7-day cumulative exposure (lag 0-6) to inclement weather and missed hemodialysis appointment (incidence rate ratios (RR) and 95% confidence intervals (CI) stratified by sex and race/ethnicity**

|                           | <b>RR (95% CI)</b>                  |                                        |                                   |
|---------------------------|-------------------------------------|----------------------------------------|-----------------------------------|
|                           | <b>Hurricane and Tropical Storm</b> | <b>Wind Advisory (sustained winds)</b> | <b>Wind Advisory (wind gusts)</b> |
| <b>Female</b>             | 1.65 (1.20, 2.28)                   | 1.30 (1.26, 1.35)                      | 1.37 (1.30, 1.44)                 |
| <b>Male</b>               | 1.44 (1.05, 1.97)                   | 1.26 (1.23, 1.30)                      | 1.32 (1.26, 1.39)                 |
| <b>Hispanic</b>           | 1.21 (0.68, 2.15)                   | 1.34 (1.27, 1.41)                      | 1.44 (1.32, 1.57)                 |
| <b>Non-Hispanic Black</b> | 1.30 (0.96, 1.75)                   | 1.26 (1.23, 1.30)                      | 1.30 (1.25, 1.36)                 |
| <b>Non-Hispanic White</b> | 2.43 (1.63, 2.43)                   | 1.33 (1.27, 1.39)                      | 1.42 (1.33, 1.52)                 |
| <b>Asian</b>              | -                                   | 1.89 (1.73, 2.07)                      | 1.98 (1.72, 2.28)                 |
| <b>Other</b>              | -                                   | 1.66 (1.45, 1.90)                      | 2.80 (2.18, 3.59)                 |

\* We were not able to do subgroup analysis for Asian and Other due to small sample size

**Supplemental Figure 1. Lag-specific association between exposure to inclement weather type and risk of missed hemodialysis stratified by sex and race/ethnicity.** Regression models included the day of the week as the covariate and an offset variable equaling the natural log of the monthly average number of scheduled appointments for each county.

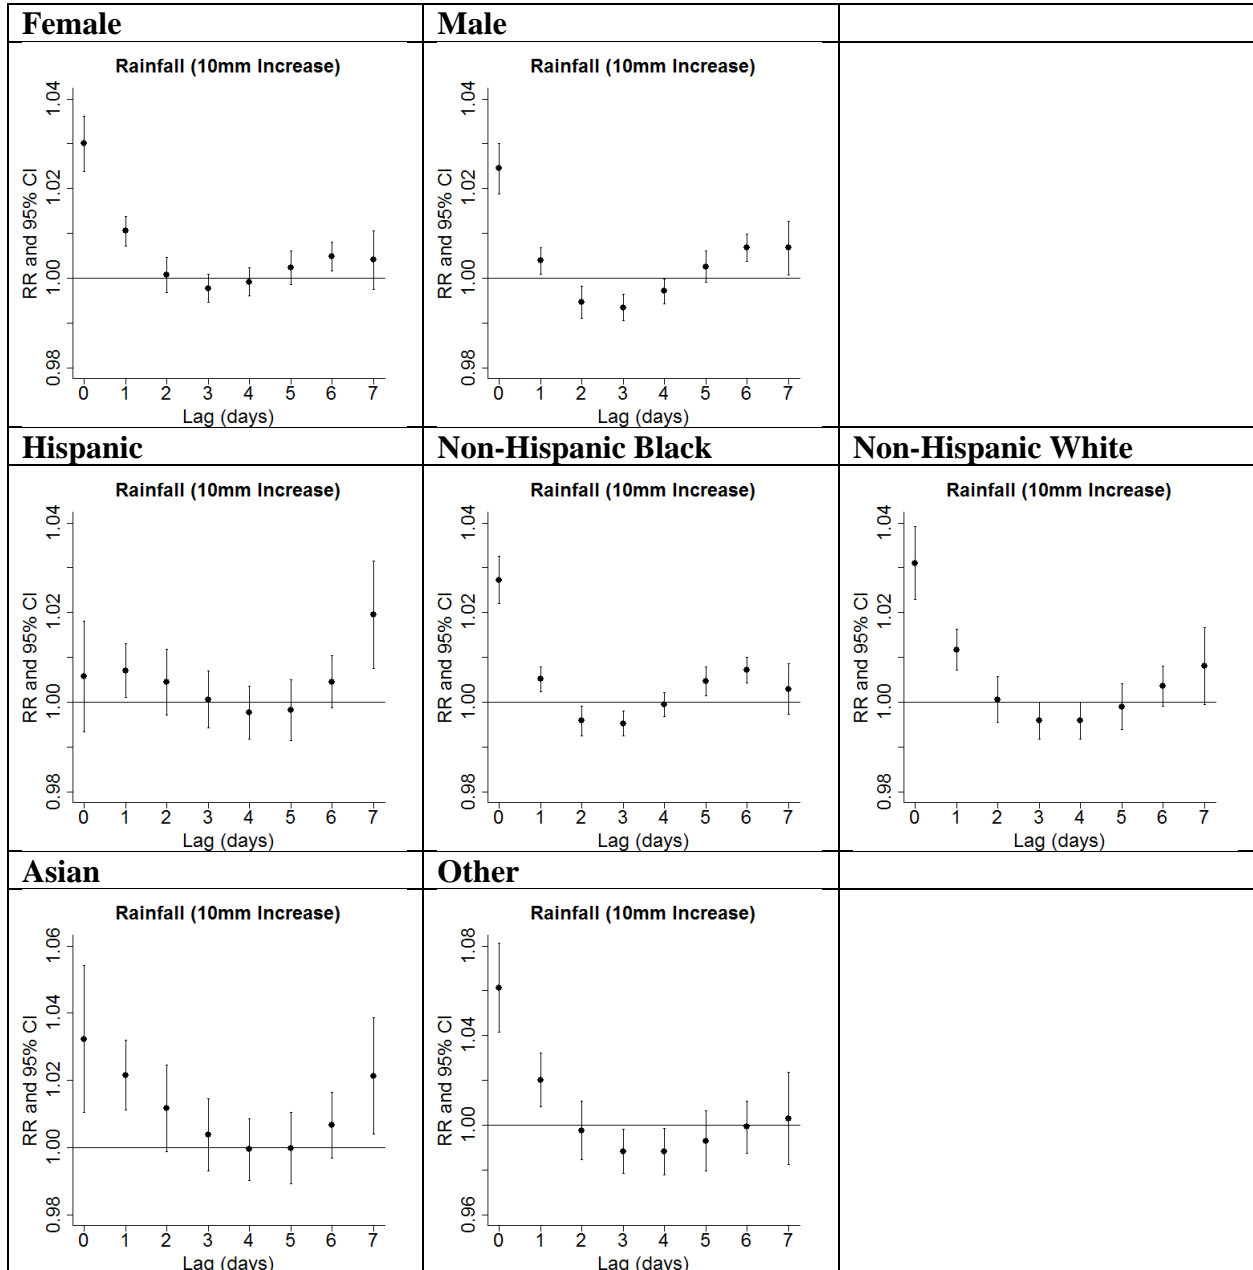

**Supplemental Figure 2. Lag-specific association between exposure to hurricane and tropical storm and risk of missed appointments stratified by sex and race/ethnicity.** Regression models included the day of the week as the covariate and an offset variable equaling the natural log of the monthly average number of scheduled appointments for each county.

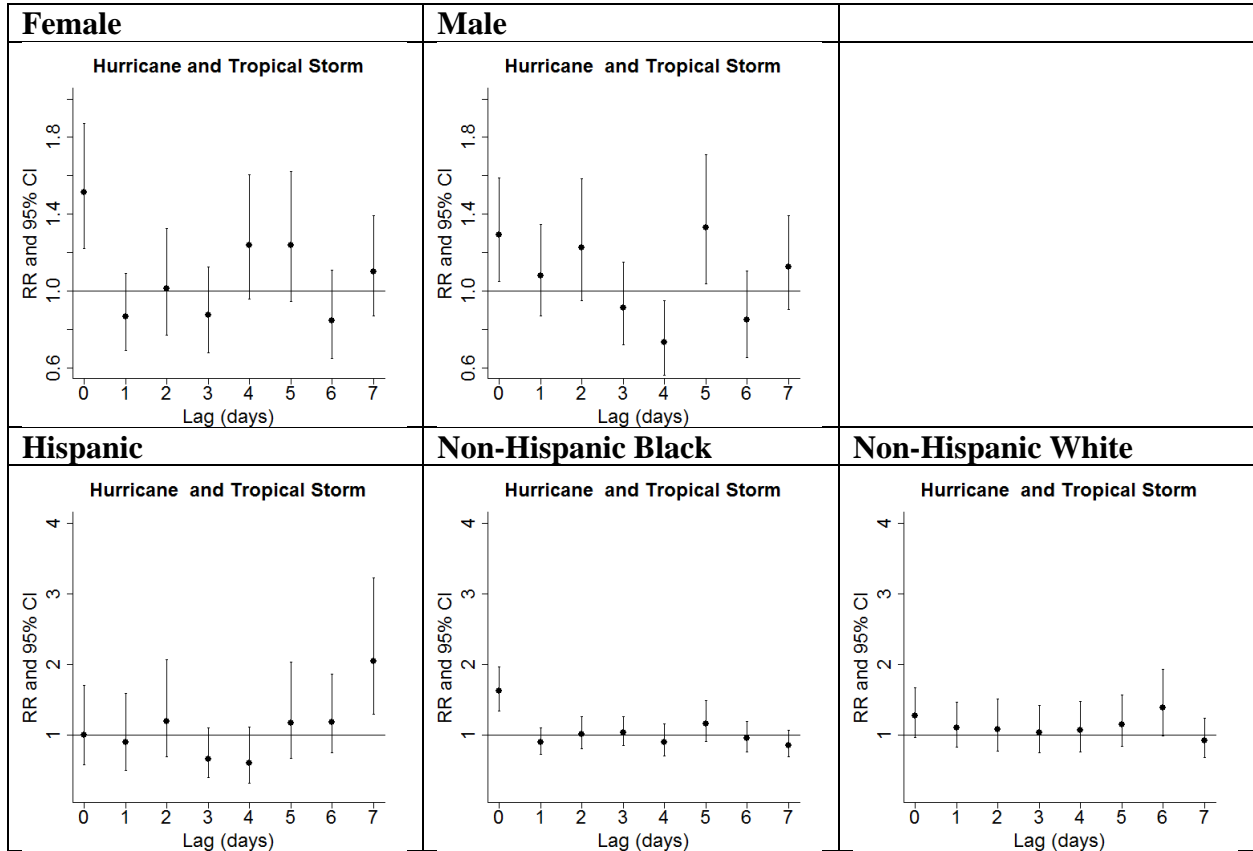

\* We were not able to do subgroup analysis for Asian and Other due to small sample size

**Supplemental Figure 3. Lag-specific association between exposure to snowfall and risk of missed appointments stratified by sex and race/ethnicity.** Regression models included the day of the week as the covariate and an offset variable equaling the natural log of the monthly average number of scheduled appointments for each county.

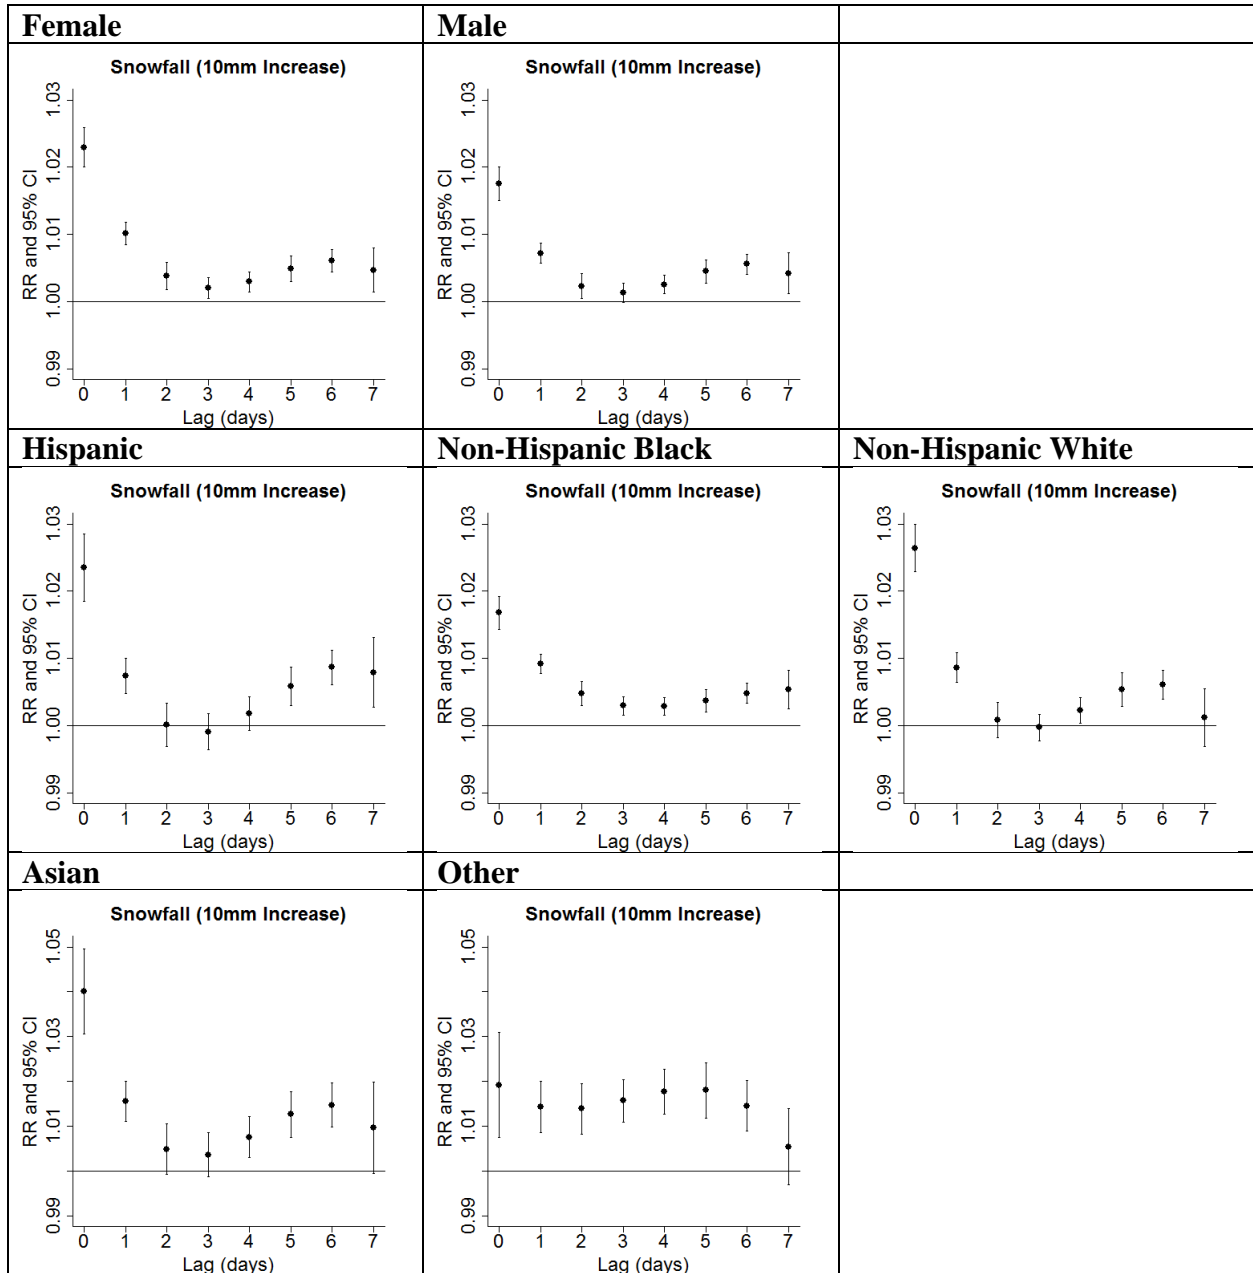

**Supplemental Figure 4. Lag-specific effects on missed hemodialysis appointments in incidence rate ratios (RR) and 95% confidence intervals (CI) for snow depth over 7 days of lag stratified by sex and race/ethnicity.** Regression models included the day of the week as the covariate and an offset variable equaling the natural log of the monthly average number of scheduled appointments for each county.

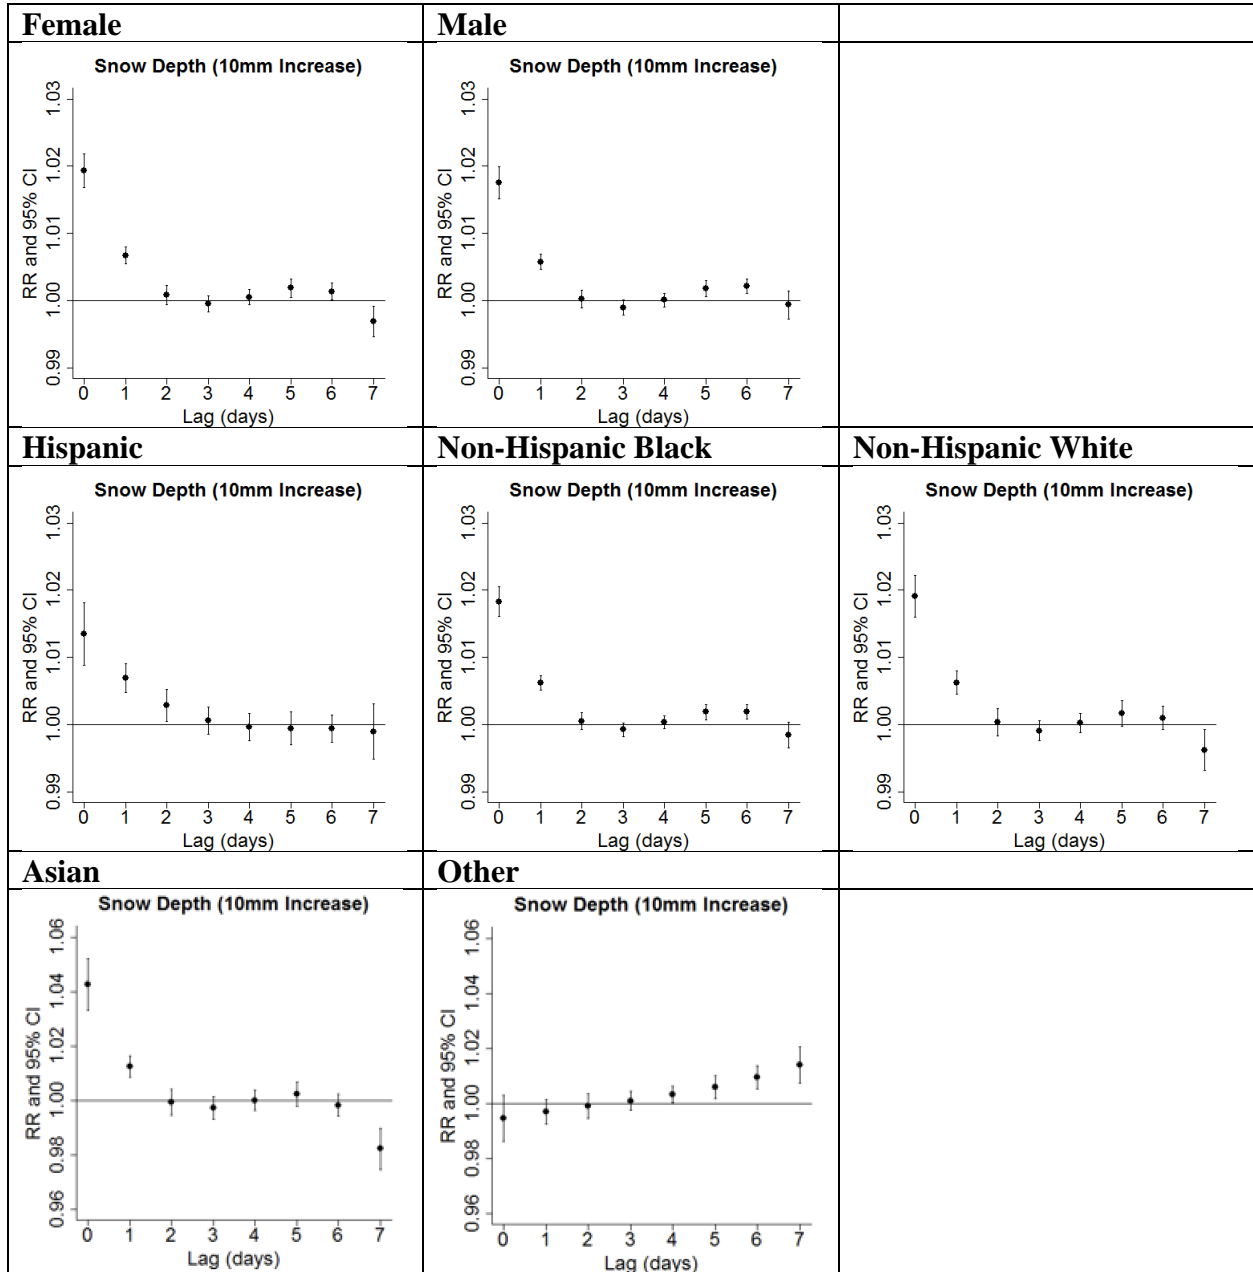

**Supplemental Figure 5. Lag-specific association between exposure to wind advisory (sustained winds) and risk of missed appointments stratified by sex and race/ethnicity.** Regression models included the day of the week as the covariate and an offset variable equaling the natural log of the monthly average number of scheduled appointments for each county.

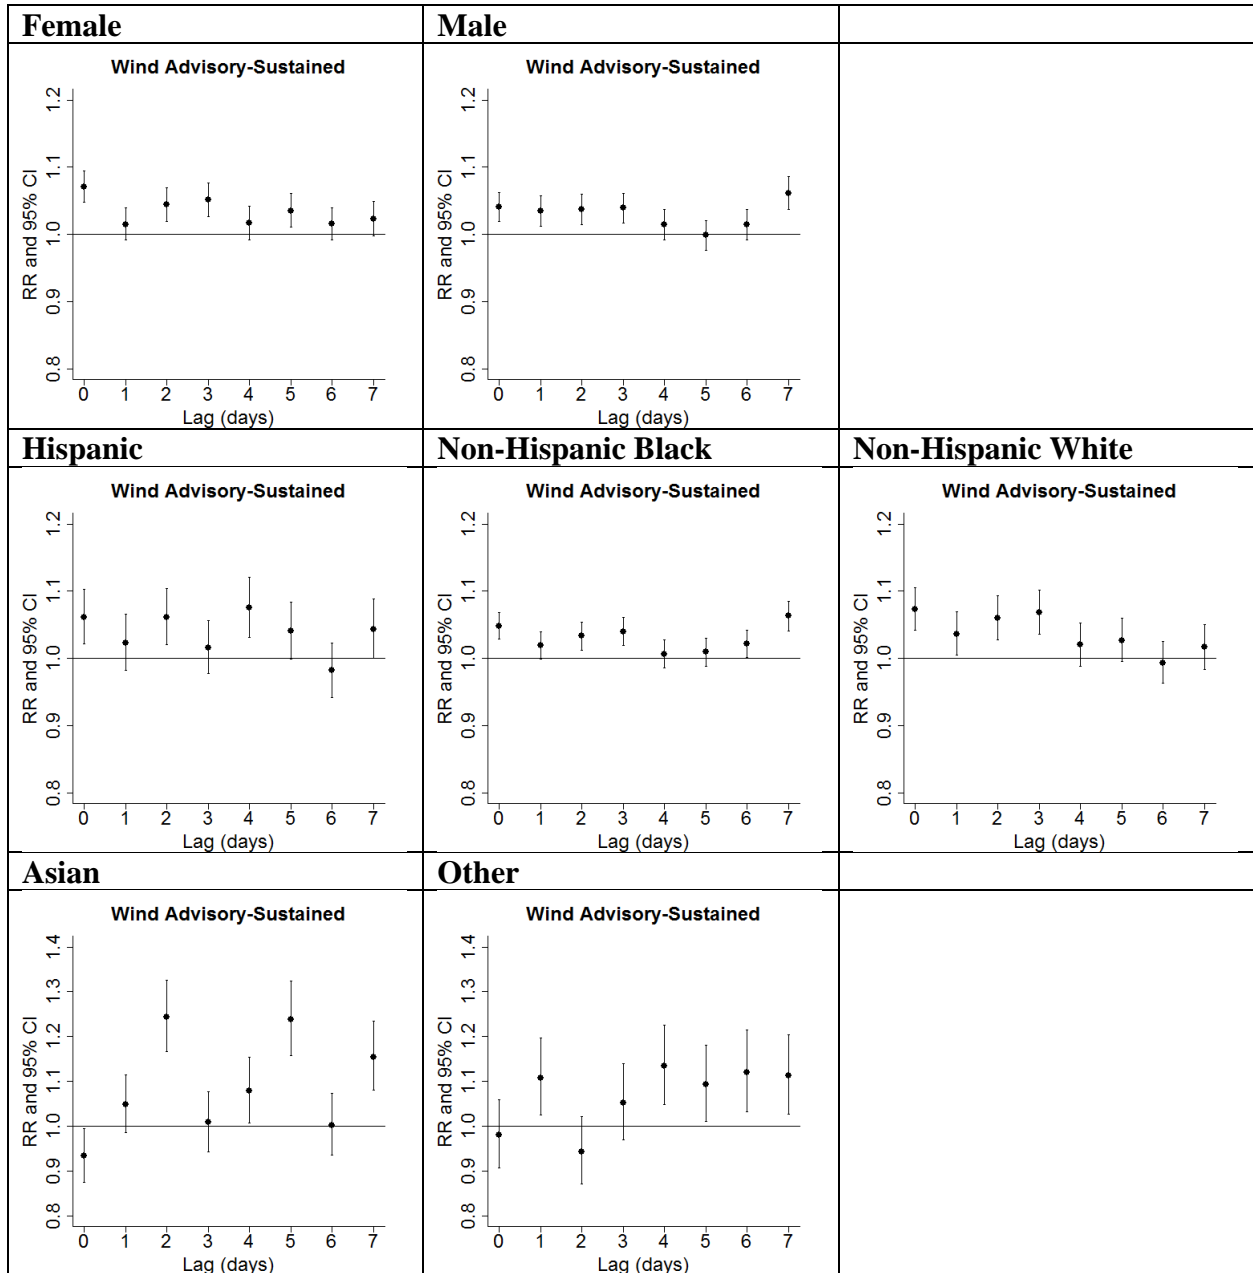



**Supplemental Figure 6. Lag-specific association between exposure for exposure to wind advisory (wind gusts) and risk of missed appointments stratified by sex and race/ethnicity.** Regression models included the day of the week as the covariate and an offset variable equaling the natural log of the monthly average number of scheduled appointments for each county.

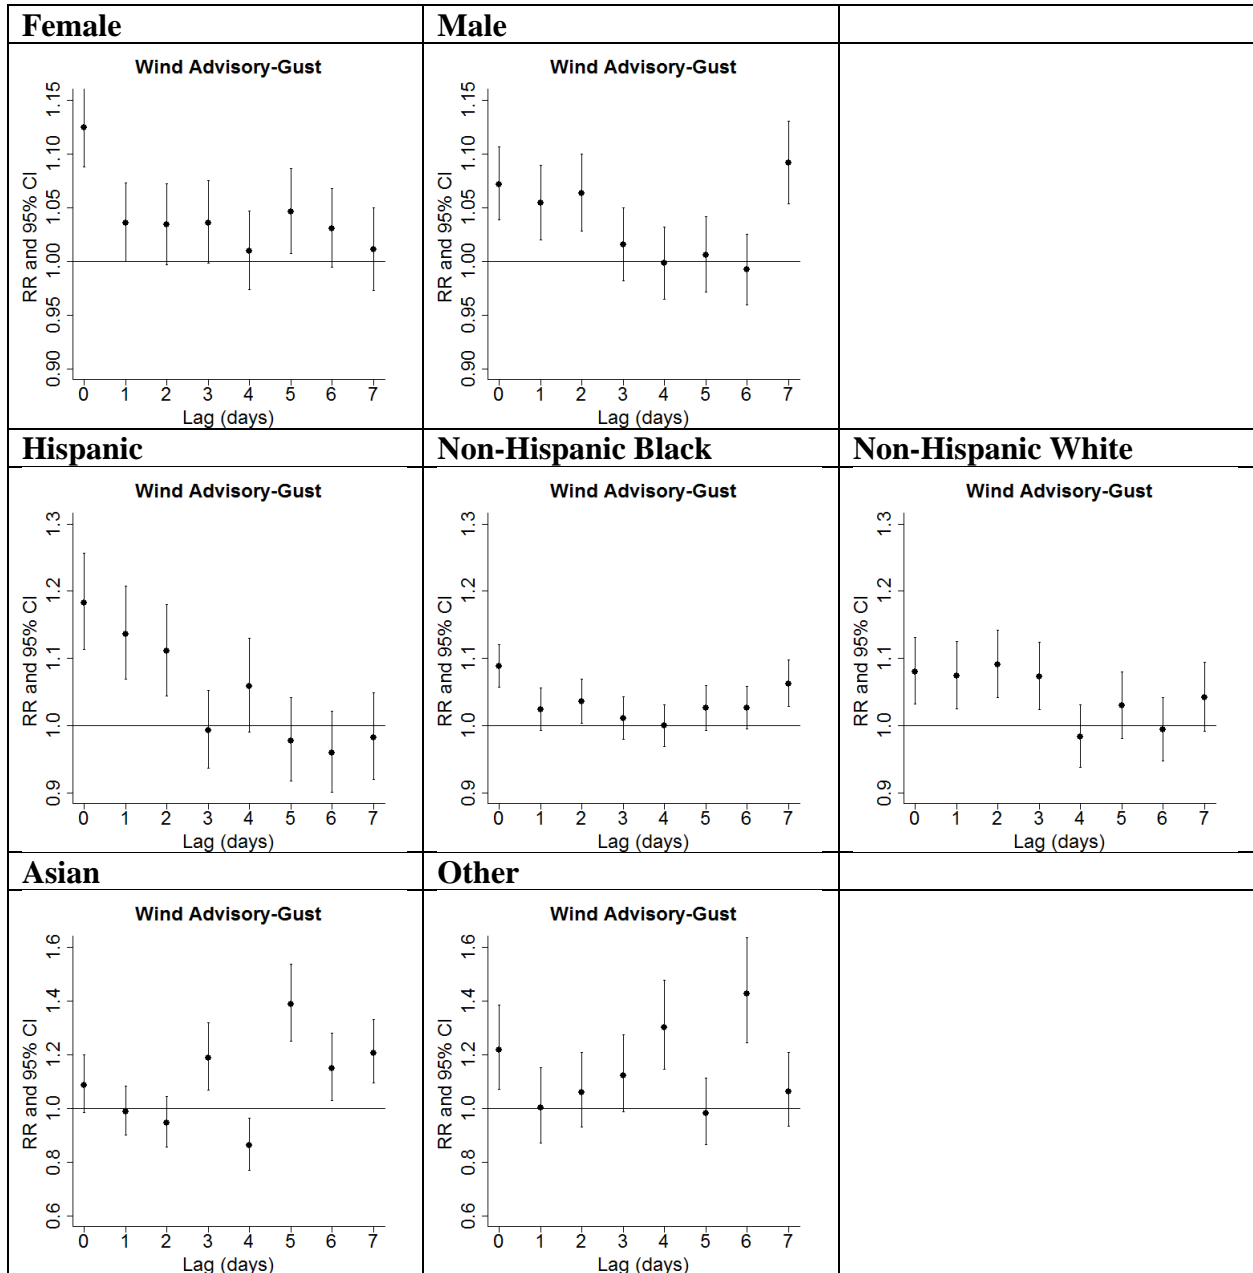

**Supplemental Figure 7. Association between seven-day cumulative (lag 0-6) exposure to inclement weather type and risk of missed hemodialysis appointment stratified by sex and race/ethnicity.** Inclement weather types were analyzed as a continuous variable. Incidence RRs are presented as black lines with 95% CI as grey region.

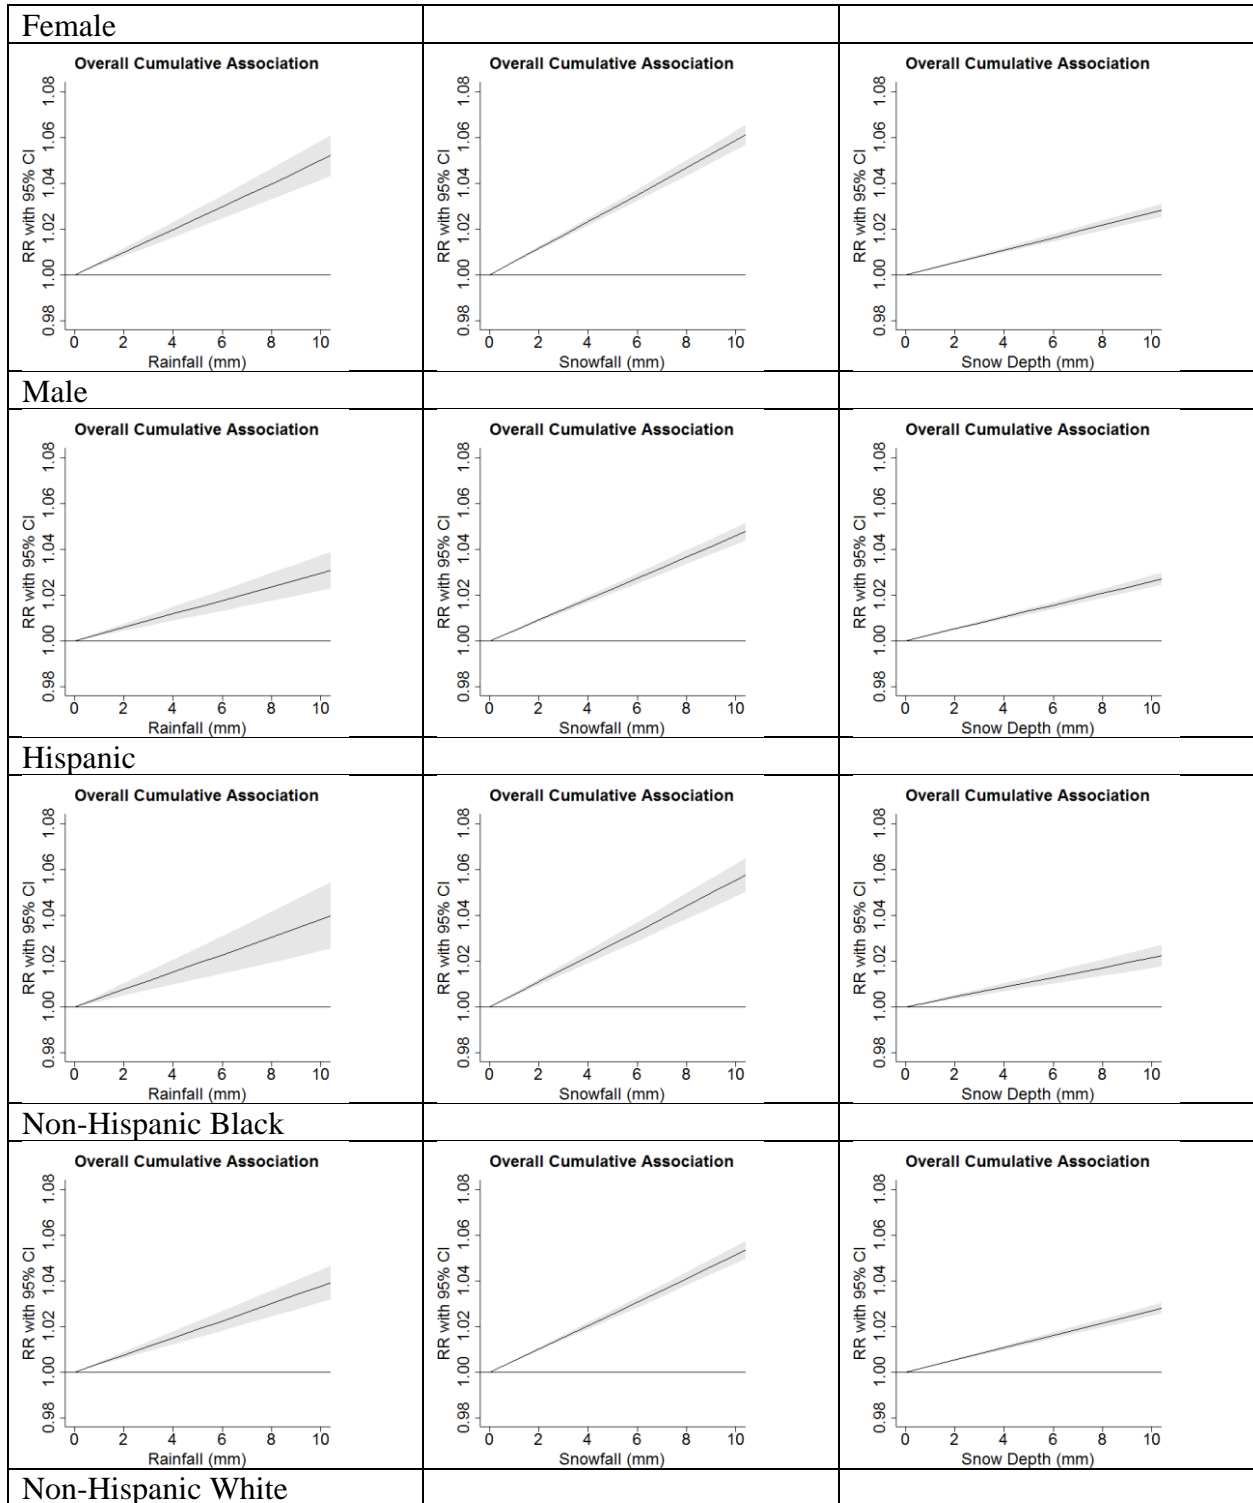

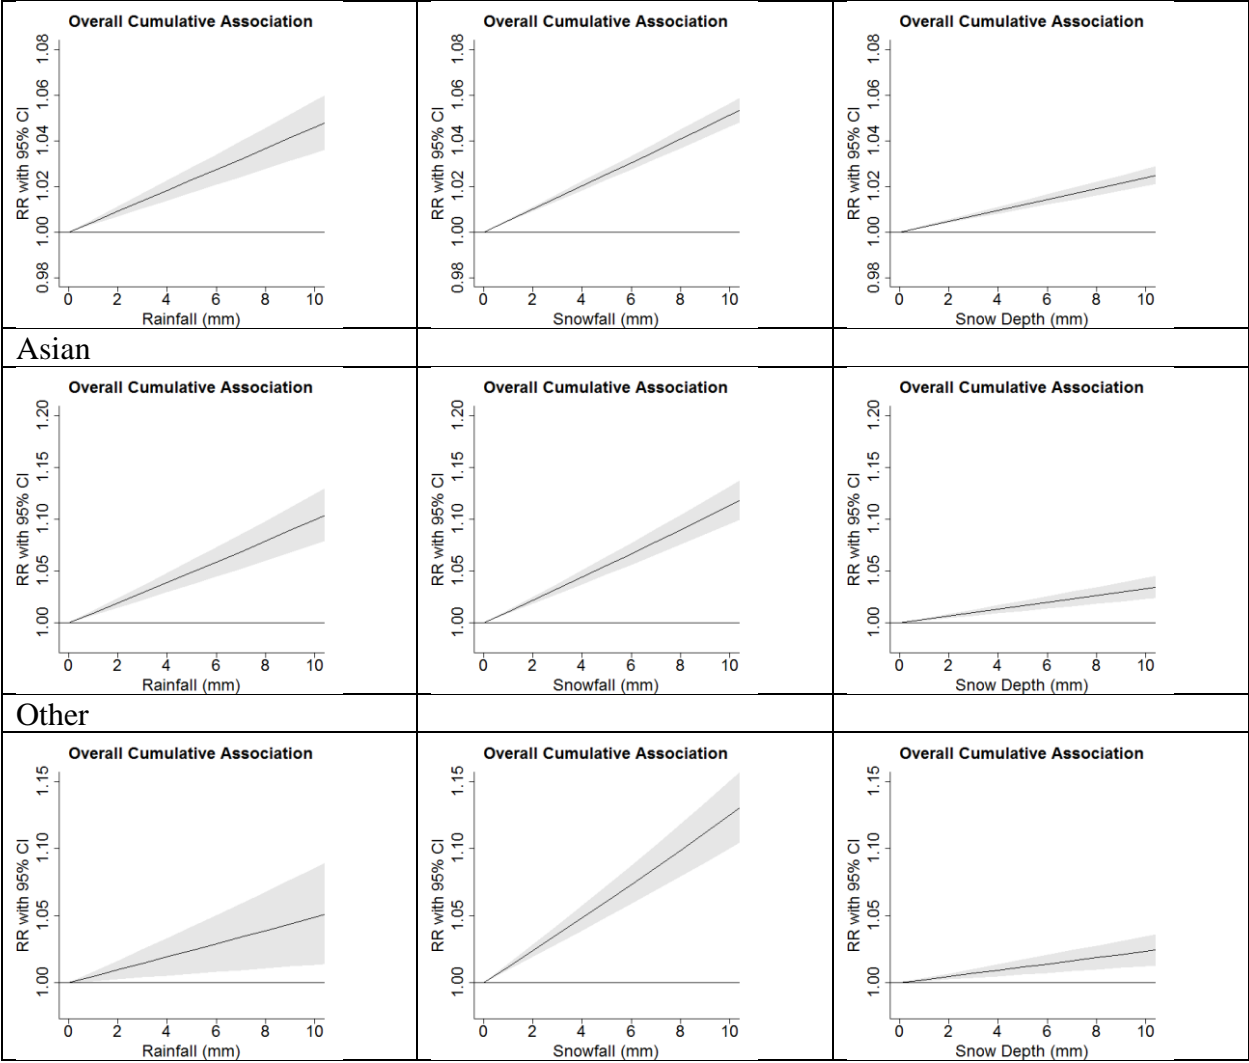

**Supplemental Figure 8. Lag-specific association between exposure to hurricane and tropical storm and risk of missed appointments. Exposure is based on alternative hurricane and tropical storm definitions (distance to storm track at 150 km or less, distance to storm track at 200 km or less, and distance to storm track at 250 km or less). Regression models included the day of the week as the covariate and an offset variable equaling the natural log of the monthly average number of scheduled appointments for each county.**

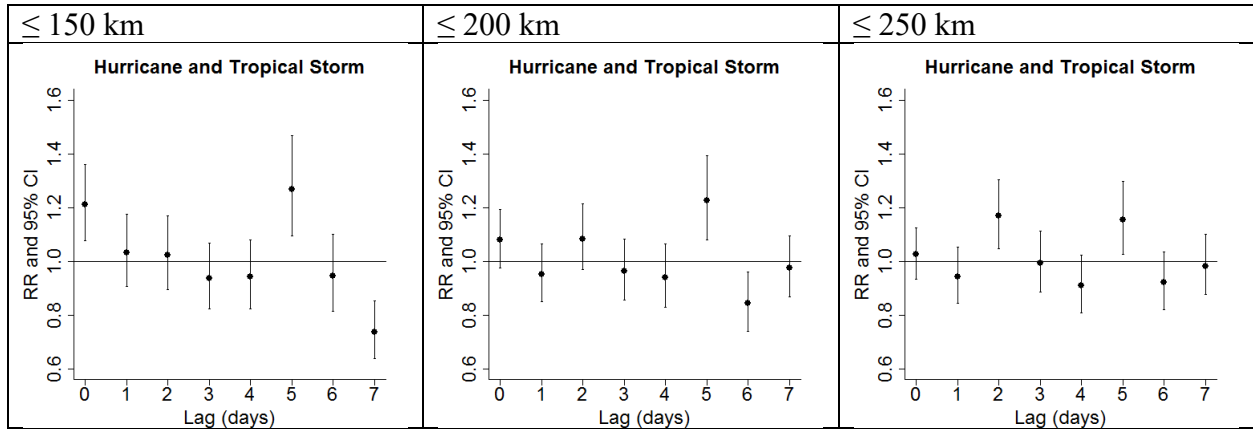

Supplement: cjasn-18-904-s001.pdf [file cjasn-18-904-s001.pdf]
